# Supplementary material for: Resistance Development: A Major Piece in the Jigsaw Puzzle of Tumor Size Modeling
Source: PubMed Central journal article supplement — CPT Pharmacometrics Syst Pharmacol. 2015 Jun 15;4(6):320–3. doi: 10.1002/psp4.45 (PMC4505826; doi:10.1002/psp4.45), 2015-06-15
Supplement: psp40004-0320-sd2.pdf [file psp40004-0320-sd2.pdf]

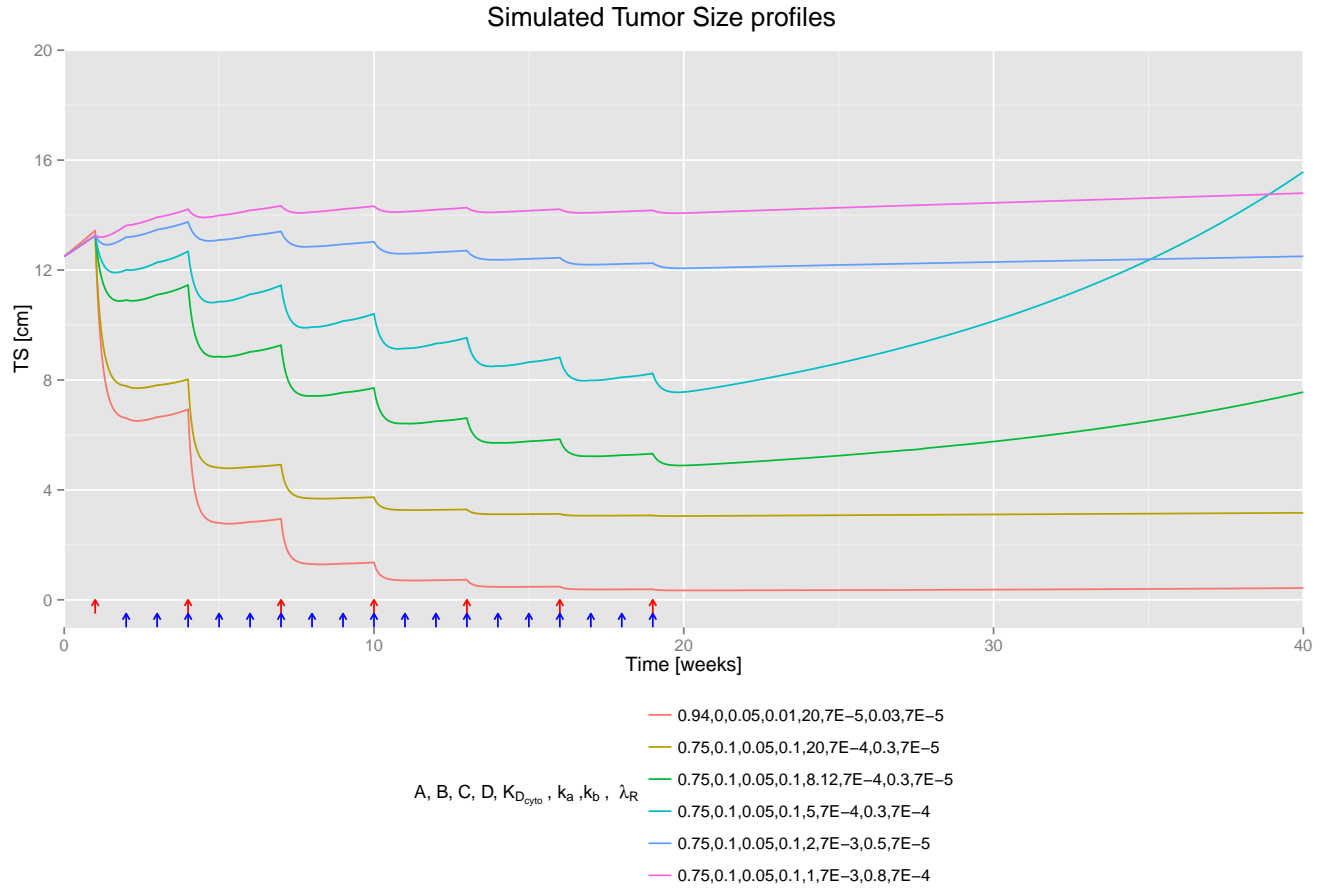

**Supplementary Figure S1:** TS profiles, characterized by different dynamics and, then, responses during and after therapy, have been simulated. In particular, starting from the parameter configuration reported in Supplementary Table S1, simulations of different tumor time courses have been obtained by varying parameters reported in the legend. Tumor dynamics simulated with nominal parameter values is shown in green. As expected, modifications of initial tumor portions, cytotoxic drug effect, proliferation rate of fully resistant cells and rates of resistance acquisition clearly influence tumor response. Administration times of the anti-EGFR inhibitor and cytotoxic drug are reported as blue and red arrows, respectively.
