# Supplementary material for: Resistance Development: A Major Piece in the Jigsaw Puzzle of Tumor Size Modeling
Source: PubMed Central journal article supplement — CPT Pharmacometrics Syst Pharmacol. 2015 Jun 15;4(6):320–3. doi: 10.1002/psp4.45 (PMC4505826; doi:10.1002/psp4.45), 2015-06-15
Supplement: psp40004-0320-sd3.pdf [file psp40004-0320-sd3.pdf]

Overview of the system dynamics resulting from the  $K_{D_{cyto}}$  parameter variation

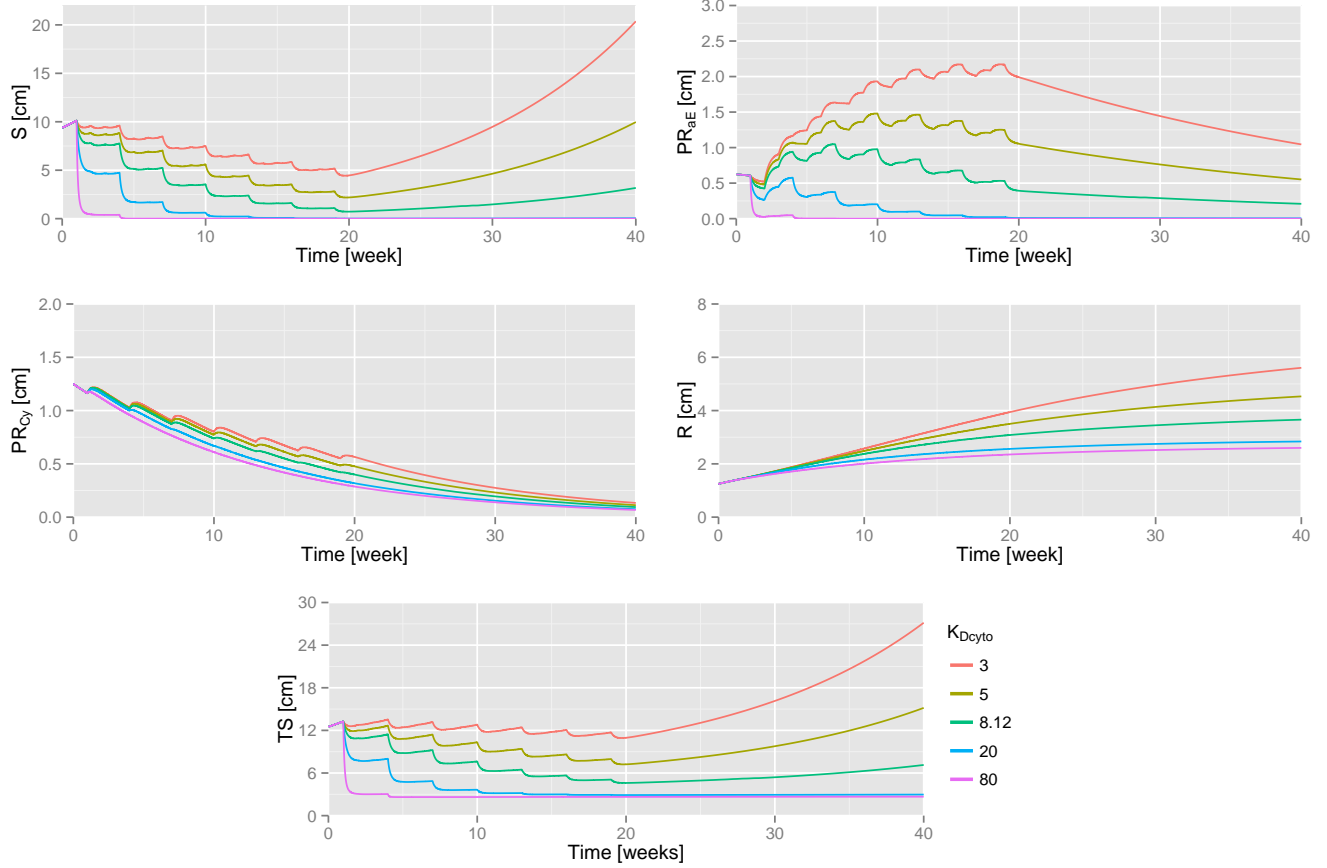

**Supplementary Figure S2:** Tumor dynamics of each defined cell subgroup is shown for different  $K_{D_{cyto}}$  values. In particular, in addition to a considerable amount of surviving sensitive cells  $S$ , a reduced cytotoxic drug effect increases the amount of partially-resistant cells  $PR_{aE}$ , first, and fully-resistant cells  $R$ , afterwards. A different behavior can be observed for increasing  $K_{D_{cyto}}$  values.

The other parameter values can be found in Supplementary Table S1. A similar administration schedule as that one reported in Supplementary Figure S1 has been considered.
